# Supplementary material for: Efficient enrichment of U(VI) by two-dimensional layered transition metal carbide composite
Source: publisher site journal article supplement (doi:10.1515/ract-2021-1130), 2022-04-30
Supplement: Supplementary file 1 [file j_ract-2021-1130_suppl.docx]

Supplementary information

**Enrichment and separation of U(Ⅵ) by two dimensional layered transition metal carbide composite**

*Yun Zhoua,b,c, Huai-Xin Haob.c, Tian-Hao Donga,b,c, Xu-Feng Nia,b,c, Yi-Chen Hub,c, Jia-Ju Ma**a,b,c, Jun-Qiang Yanga,b,c, Ke-Liang Shia,b,c, Guo-Jian Duand, Tong-Huan Liua,b,c**

*aFrontier Science Center for Rare Isotopes, Lanzhou University, Lanzhou 730000, P. R. China*

*b School of Nuclear Science and Technology, Lanzhou University, 730000, Lanzhou, P. R. China;*

*c**Key Laboratory of Special Function Materials and Structure Design, Ministry of Education, Lanzhou University, 730000, Lanzhou, P. R. China;*

*dGansu University of Chinese Medicine, Lanzhou 730000, P. R. China;*

**Author Contributions:***Y.Z. and H.H. contributed equally to this work.*

**Adsorption data fitting by kinetics models**

The linear equations of pseudo-first-order kinetic model and pseudo-second-order kinetic model are as follows:

(1)

(2)

where *k1* (min-1) and *k2* (g·mg-1·min-1) are the corresponding adsorption rate constants. *qt*(mg/g) is the adsorption amount at time *t*.

**Adsorption data fitting by isotherm models**

Langmuir isotherm model, Freundlich isotherm model, and Dubinin-Radushkevich (D-R) model are shown as follows:

1. Langmuir isotherm model:

(3)

where *qmax*(mg/g) corresponds to the maximum adsorption capacity for complete monolayer coverage. *KL*(L/g) is the adsorption equilibrium constant, representing the affinity of the adsorbent for the adsorbent.

1. Freundlich isotherm model:

(4)

where *KF*(mg1-nLng-1) is the equilibrium constant. *n* is the characteristic constant ranging from 0 to 1.

1. Dubinin-Radushkevich (D-R) model:

(5)

(6)

(7)

where *qe*(mol/g) and *Ce* (mol/L) are molar equilibrium concentrations. *KDR* is equilibrium constant. *E* (kJ/mol) is adsorption energy. *ε* is polanyi potential. *R* (J·K-1·mol-1) is gas constant. *T*(K) is Kelvin temperature. In the D-R isotherm model, the adsorption energy *E* can determine the type of adsorption reaction: (1) When *E*>8 kJ/mol, it is chemical adsorption; (2) When *E*<8 kJ/mol, it is physical adsorption.

**Acid stability [experiment](javascript:;)**

The material was soaked at pH of 1.8 for 0, 1, 2, 3, 5 and 7 days respectively, and then removed for adsorption experiment. The specific steps are the same as the above adsorption experiment. After reaching the adsorption equilibrium for 24 h, the suspension was centrifuged and the concentration of U(VI) in the supernatant was determined by arsenazo III method. Three parallel experiments were conducted for each condition. In order to judge the stability of the material under acidic conditions, the influence of soaking time on the adsorption of the material was compared.

**Figure S1.** The linear fitting of kinetics data for U(VI) sorption by PAO/Ti3C2Tx with the pseudo-first-order kinetic (a) and the pseudo-second-order kinetic (b) models.

**a**

**b**

**c**

**a**

**b**

**Figure S2.** The linear fitting of sorption isotherm for U(VI) by PAO/Ti3C2Tx with the Langmuir (a), Freundlich (b) and Dubinin–Radusckevich (c) models.

**Figure S3.** Linear plots of ln K0 vs. 1/T for U(VI) sorption on PAO/Ti3C2Tx.

**Figure S4.** Ti3C2Tx EDS elemental maps of C, N, and Ti.

**Ti**

**C**

**N**


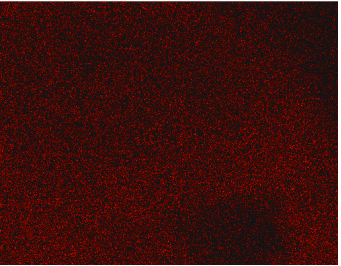

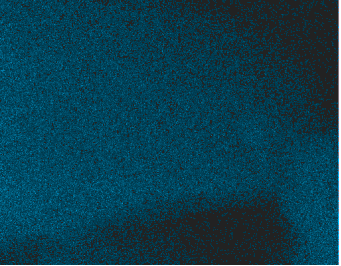

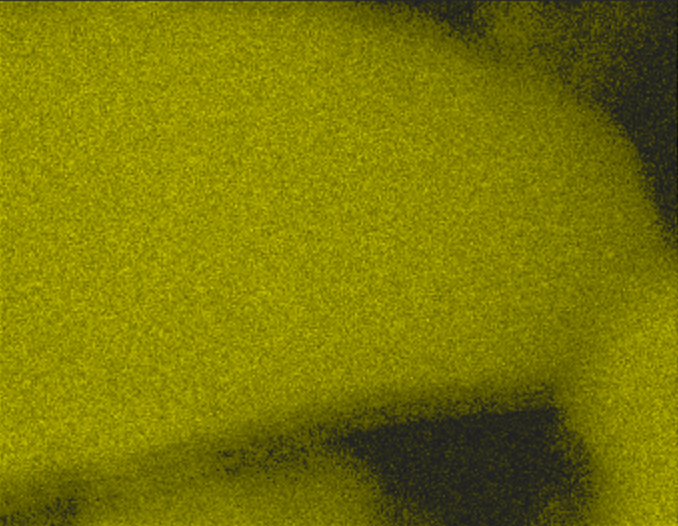

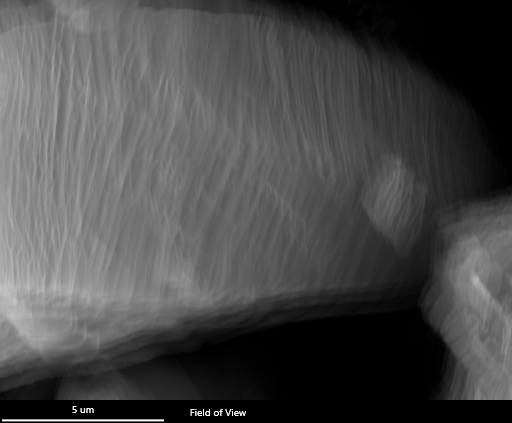


**Ti**


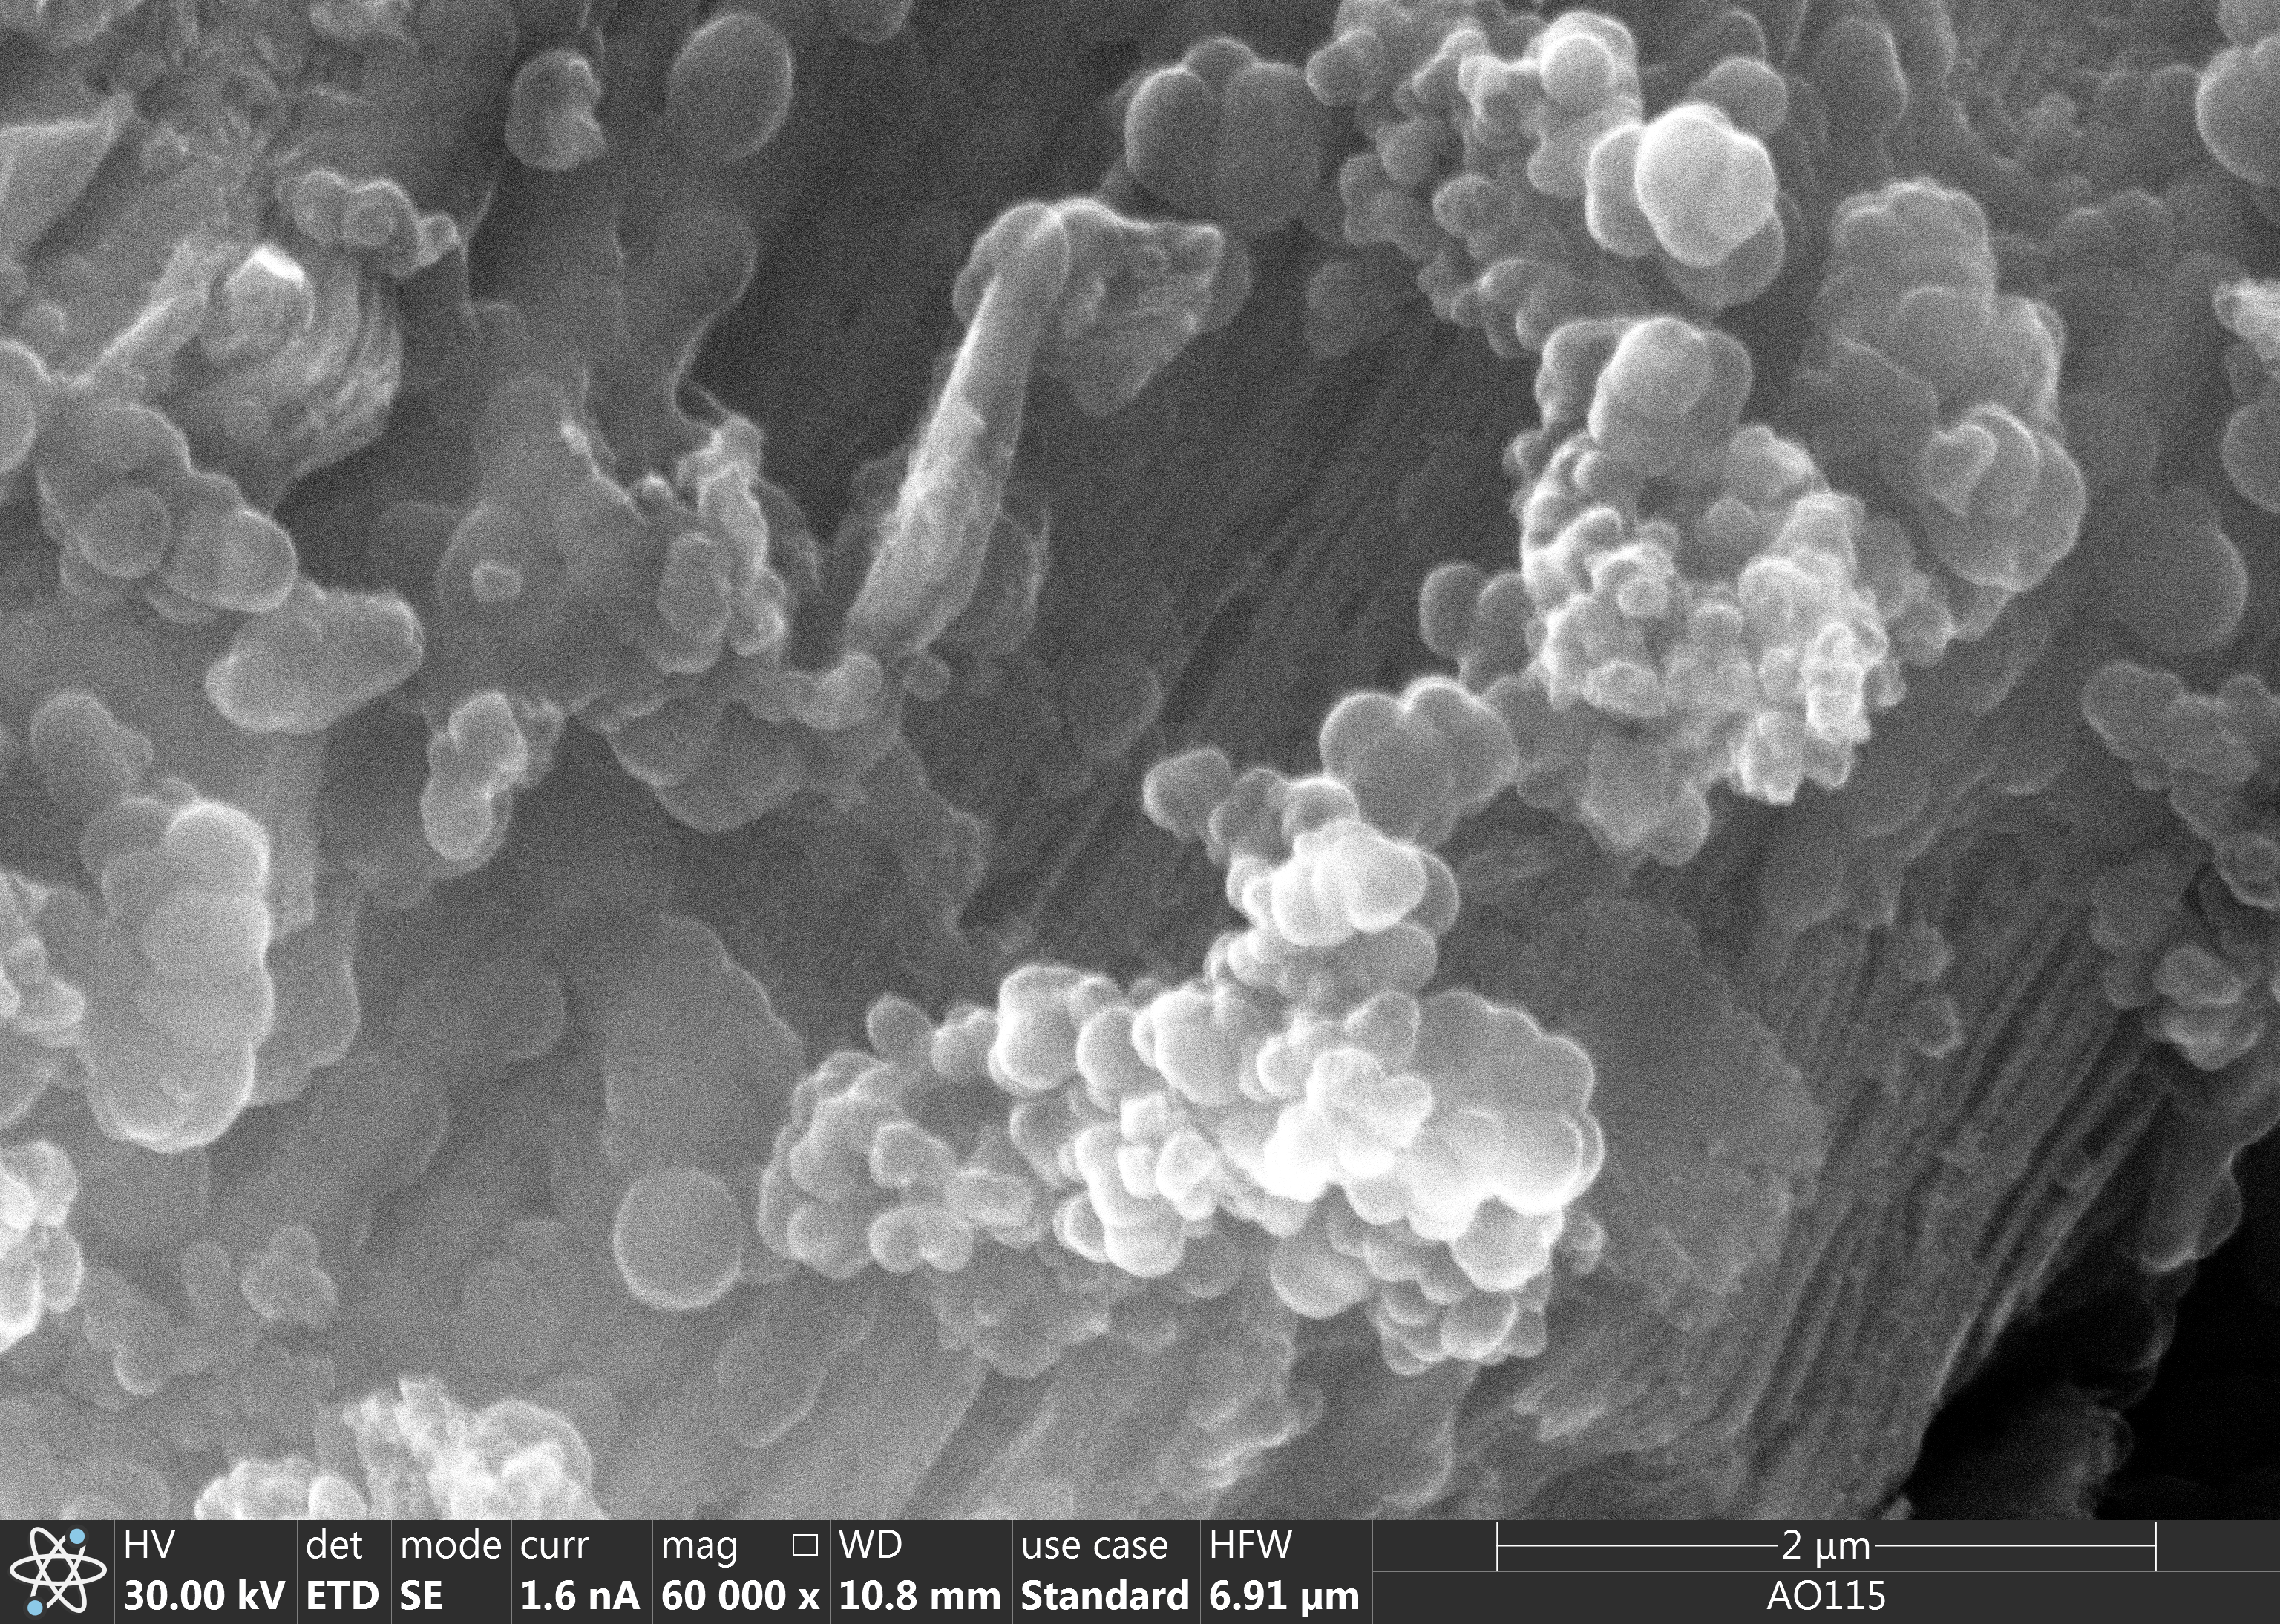

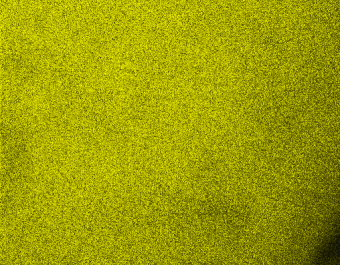

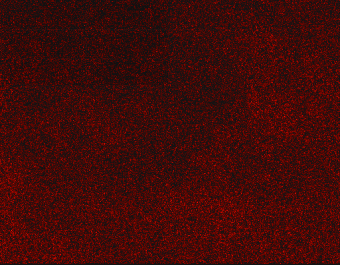

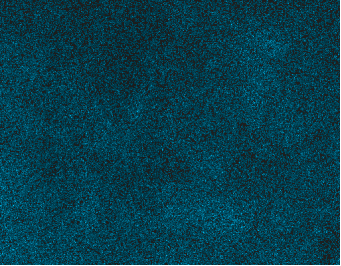


**N**

**C**

**Figure S5.** PAO/Ti3C2Tx EDS elemental maps of C, N, and Ti.


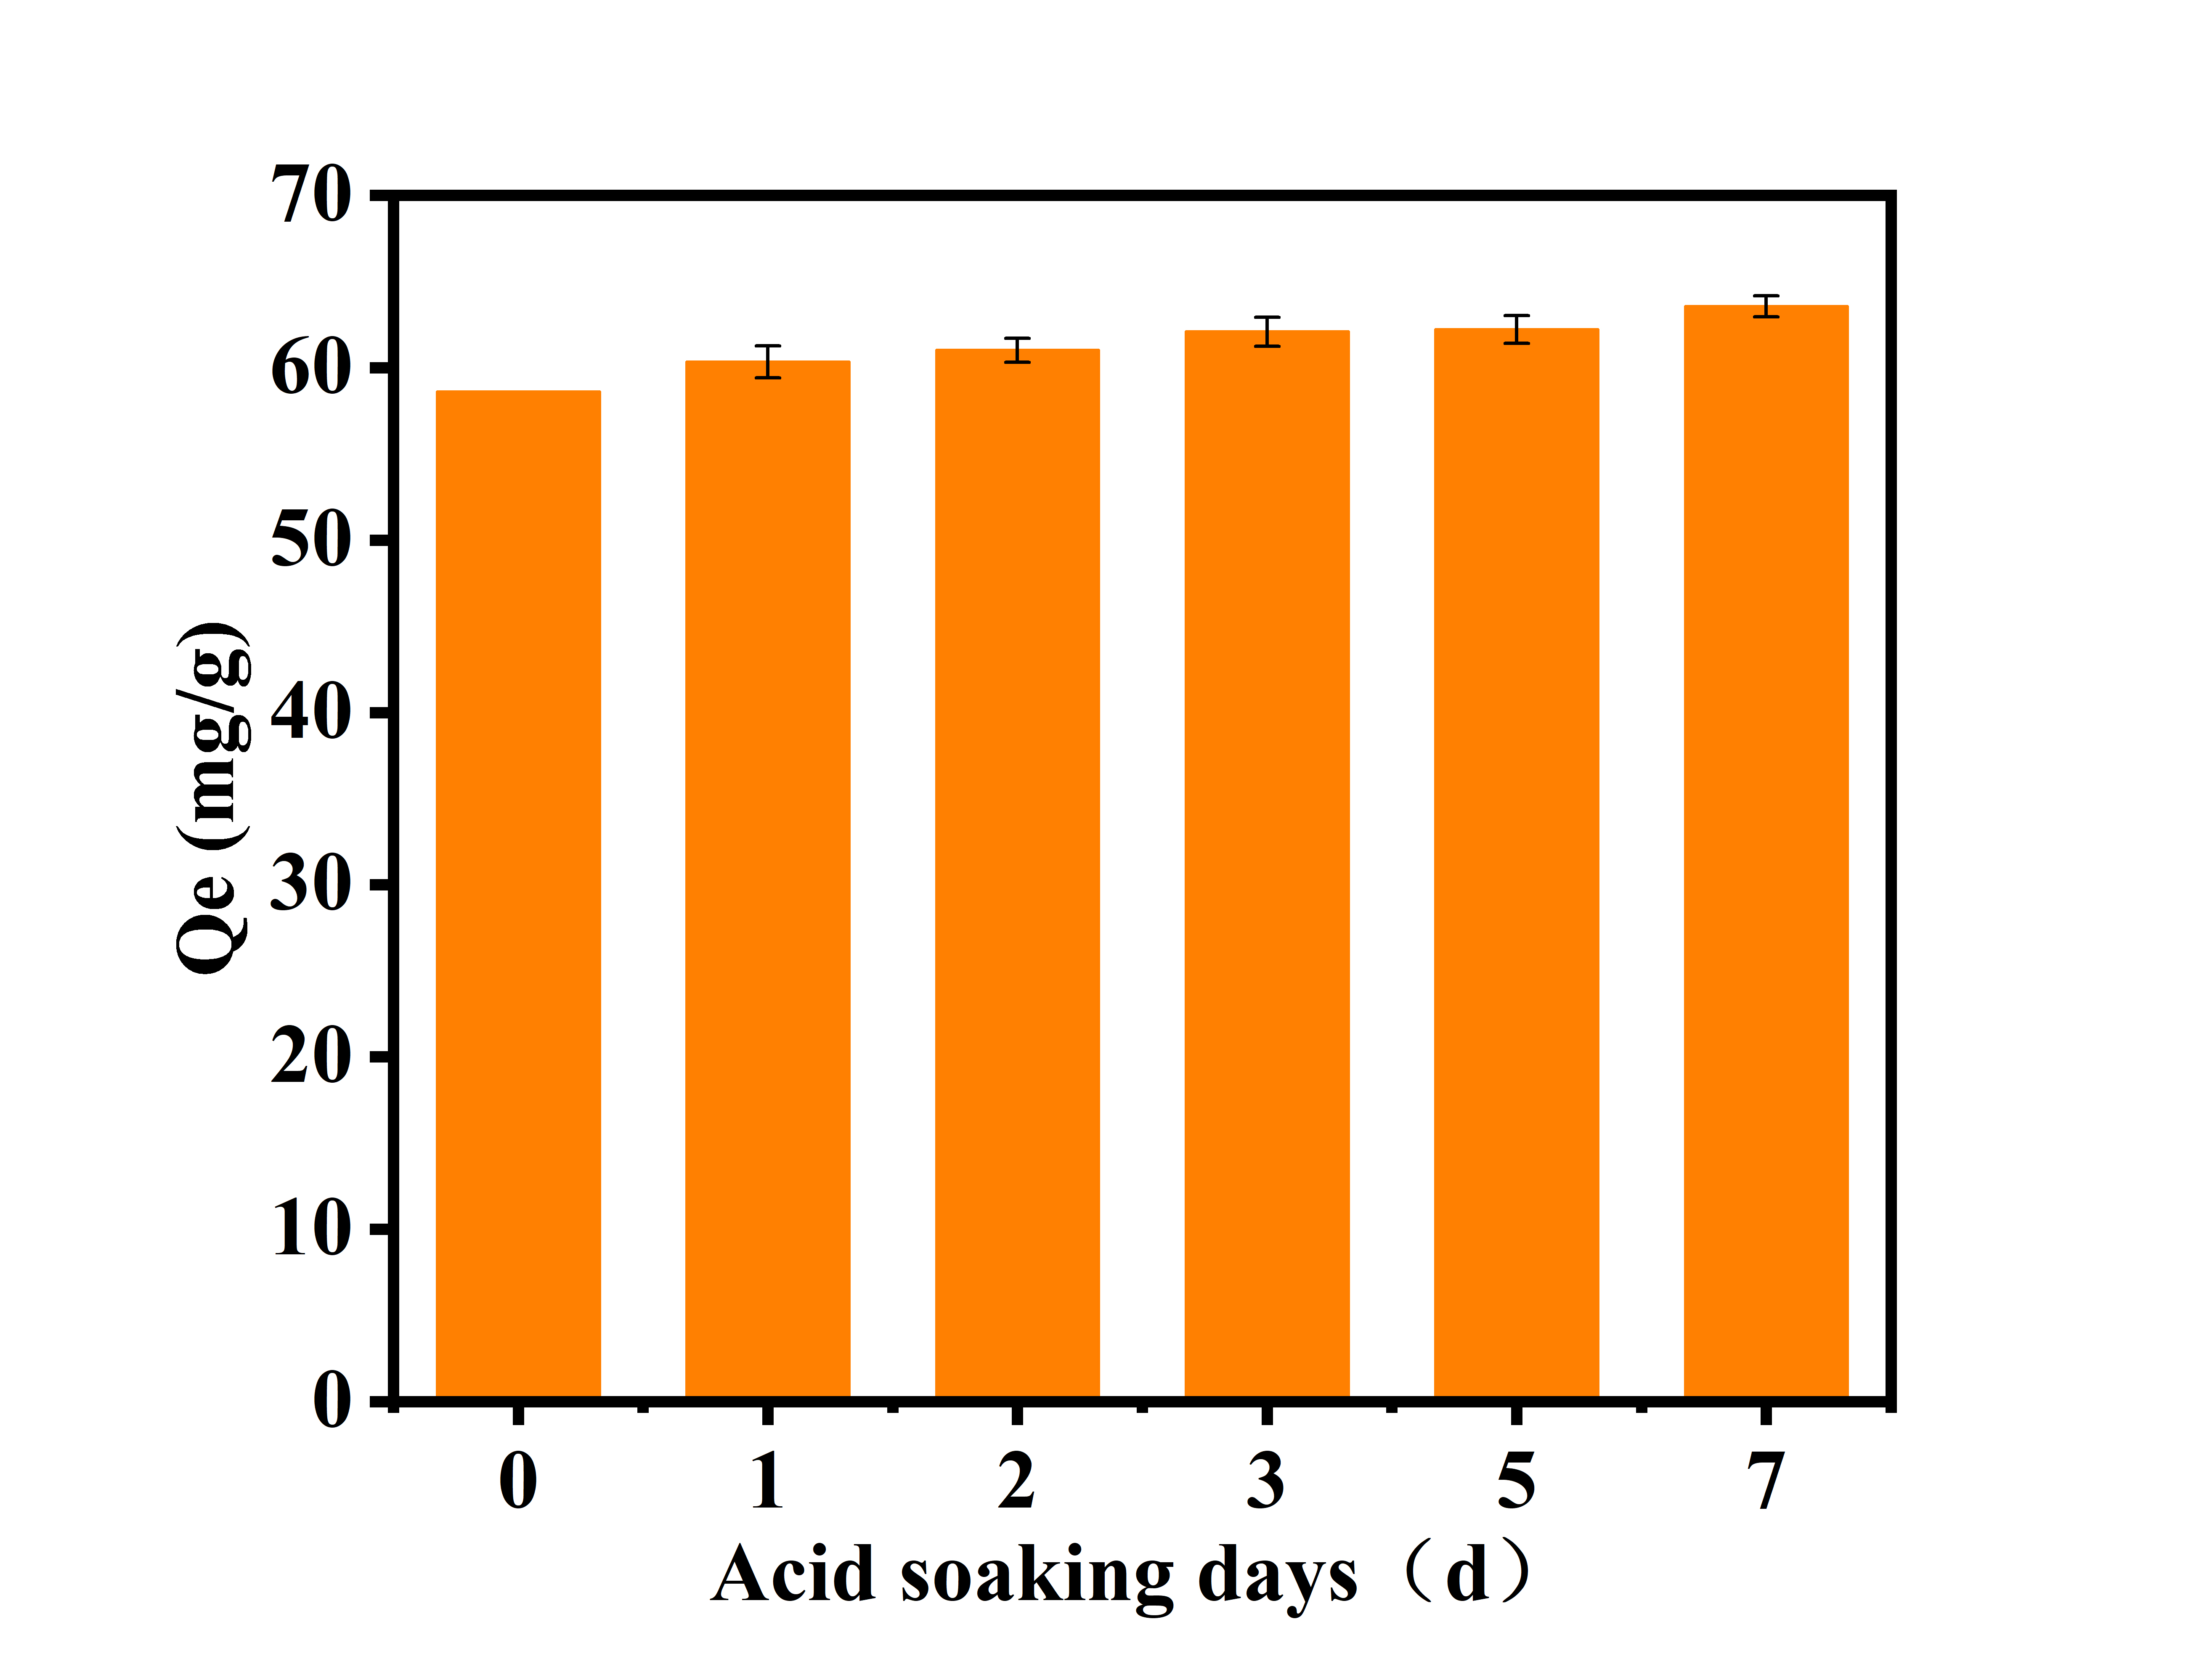


**Figure S6.** The influence of soaking days in acidic environment on adsorption. pH=4.00 ± 0.05, C[solid-liquid ratio]=0.24 g/L, C0[U(Ⅵ)]= 8.403×10-5 mol/L, T=25.00 ℃.

**Table S1.** Amount of synthesized PAN/Ti3C2Tx reactants

| No. | Ti3C2Tx | Acrylonitrile |
| --- | --- | --- |
| 1 | 0.5g | 2mL (1.612g) |
| 2 | 0.5g | 3mL (2.418g) |
| 3 | 0.5g | 4mL (3.224g) |
